# Supplementary material for: Recombinant AAV-CEA Tumor Vaccine in Combination with an Immune Adjuvant Breaks Tolerance and Provides Protective Immunity
Source: PubMed Central journal article supplement (PMC6329706; doi:10.1016/j.omto.2018.12.004), 2018-12-13
Supplement: mmc1.pdf [file mmc1.pdf]

**OMTO, Volume 12**

**Supplemental Information**

**Recombinant AAV-CEA Tumor Vaccine  
in Combination with an Immune Adjuvant Breaks  
Tolerance and Provides Protective Immunity**

**Jonathan A. Hensel, Vinayak Khattar, Reading Ashton, and Selvarangan Ponnazhagan**

## Supplemental Figure 1

**Antibody Control**

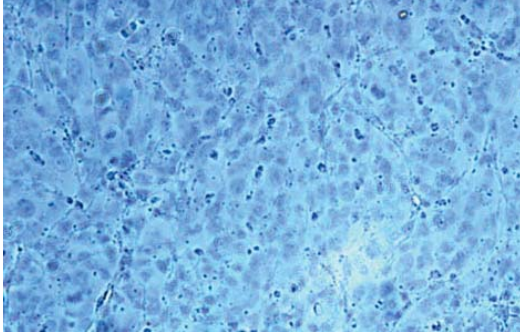

**PD-L1**

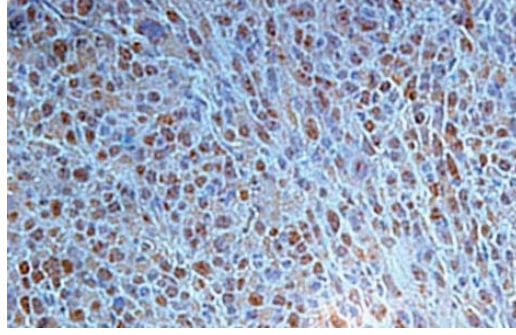

**PD-L1 expression in MC38-CEA tumor.** Representative immunohistochemistry analysis indicates high expression of PD-L1 in a mouse with resistant tumor growth, within the rAAV-CEA treatment group.
